# Supplementary material for: Fungal Community Succession of Populus grandidentata (Bigtooth Aspen) during Wood Decomposition
Source: MDPI journal article supplement (doi:10.3390/f14102086), 2023-10-18
Supplement: s1 [file s1]

## Supplemental Figures & Tables

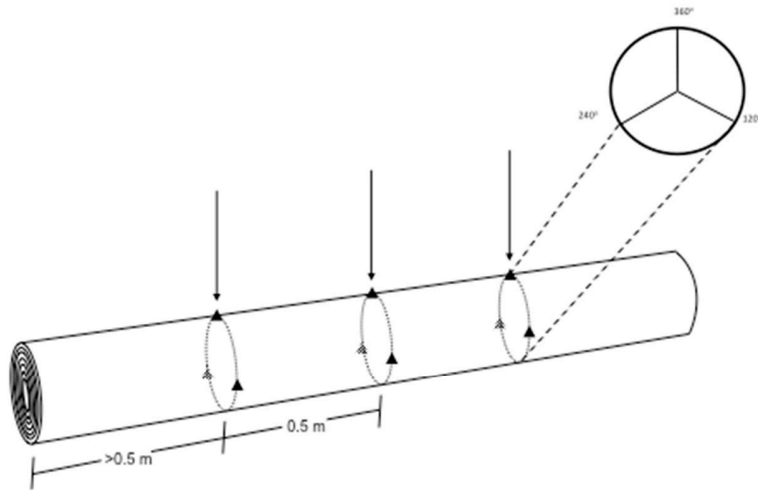

Supplemental Figure S1. Logs were sampled in boles of *Populus grandidentata* at 9 points. First, 3 transects running perpendicular to the length of the log were found, each  $\sim 0.5\text{ m}$  from each other or from the end of the log. Then 3 drilling points were identified along each transect (at  $360$  (top of the log),  $120$ , and  $240$  degrees) from which to collect samples. The 9 samples were composited for community and chemistry analyses.

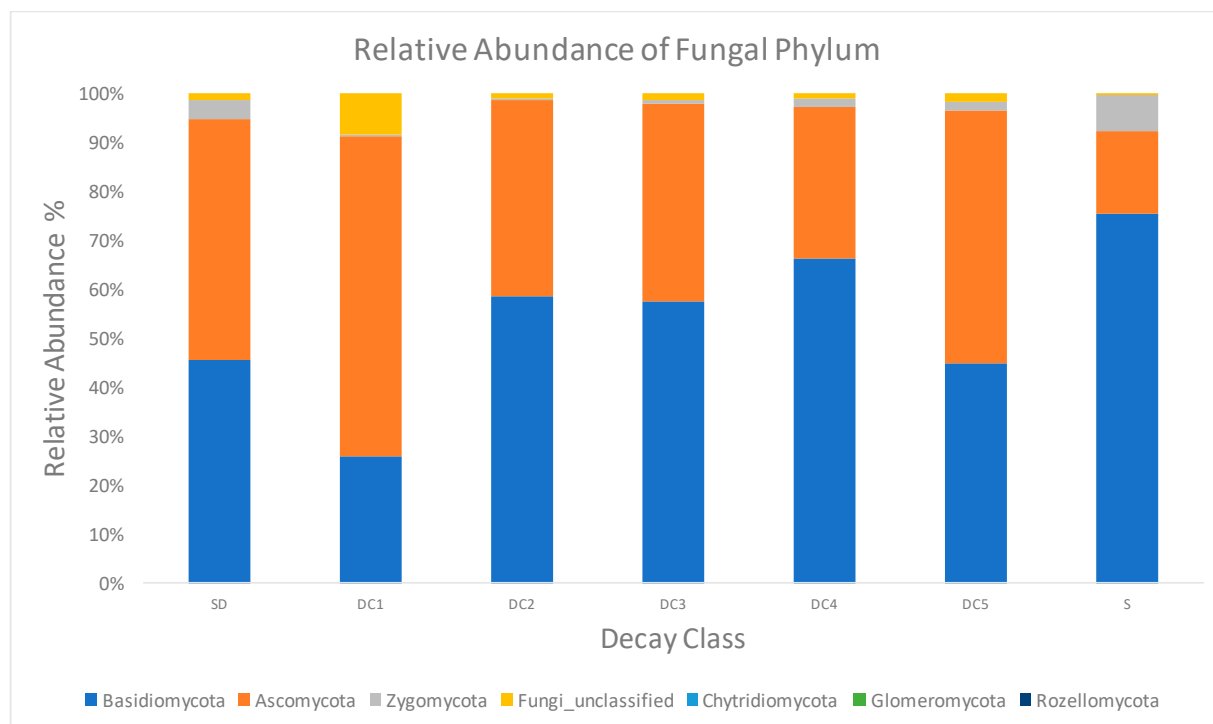

Supplemental Figure S2. The average abundances (as % of classified sequences) of the dominant fungal phyla across standing dead (SD) wood, the various wood decay stages (DC1-DC5), and soil (S). (SD=standing dead, DC1=decay class 1, DC2=decay class 2, DC3=decay class 3, DC4=decay class 4, DC5=decay class 5). N=27 (4 per decay stage of log, 3 soil).

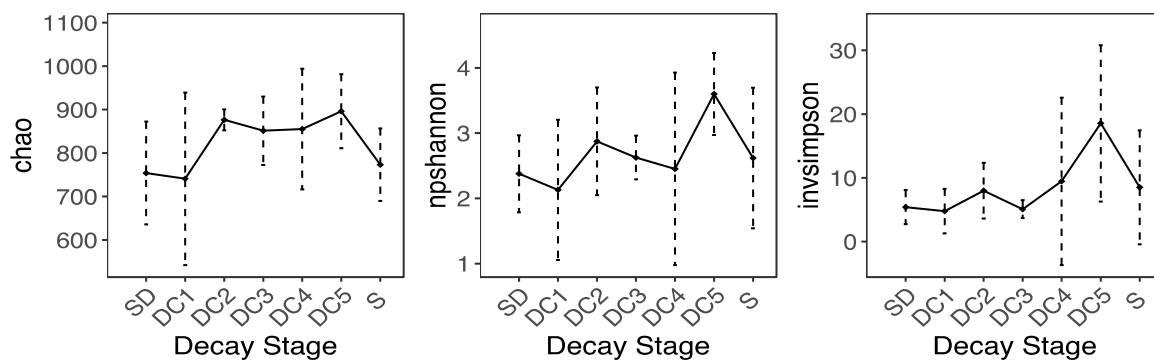

Supplemental Figure S3. Diversity indices across CWD decay stages from standing dead to soil. No differences (n.s.) were found in richness based on abundances (chao) or evenness + richness (npshannon & invsimpson) indices within wood or between wood and soil. Hashed whiskers represent standard deviation. (SD=standing dead, DC1=decay class 1, DC2=decay class 2, DC3=decay class 3, DC4=decay class 4, DC5=decay class 5). N=27 (4 per decay stage of log, 3 soil).

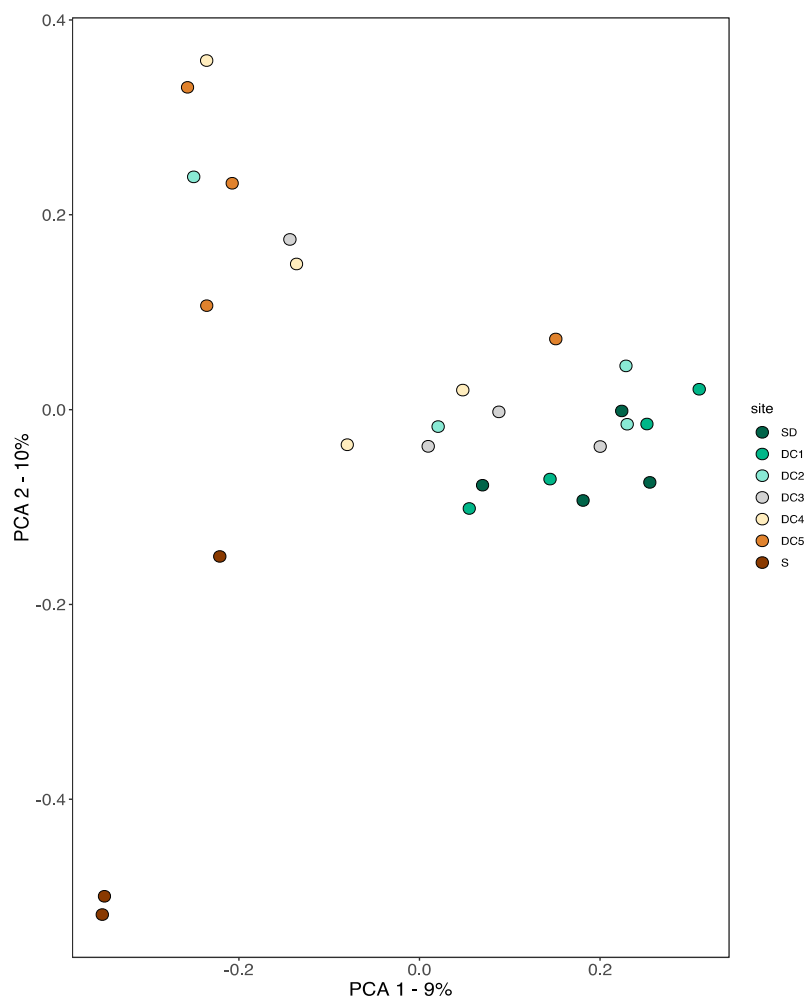

Supplemental Figure S4. Principal coordinates analysis (PCoA) of fungal communities in soil and wood decay stage samples based on Bray-curtis abundance using ThetaYC calculator of dissimilarity. The PCoA explains 19% of the total variation in fungal community dissimilarity. (SD=standing dead, DC1=decay class 1, DC2=decay class 2, DC3=decay class 3, DC4=decay class 4, DC5=decay class 5). N=27 (4 per decay stage of log, 3 soil).

Supplemental Table S1. Coarse woody debris classification guide adapted from the Forest Inventory and Analysis National Core Field Guide. Note: Decay class 5 logs are difficult to identify as they blend into the duff, litter, and soil layers. The decay class 5 logs in our study were identified using samples from an older study. Estimates of log ages were based on decay rates in other published studies (Harmon et al., 2020; Kahl et al., 2017).

| Coarse Woody Debris Decay Classification |                                                                                                       |                                                                                                                         |                                                 |
|------------------------------------------|-------------------------------------------------------------------------------------------------------|-------------------------------------------------------------------------------------------------------------------------|-------------------------------------------------|
| Decay Class                              | Structural Integrity                                                                                  | Texture of Rotten Portions                                                                                              | Estimated Ages of Logs in Each Category (years) |
| Standing Dead                            | Sound, bark intact, branches present, standing of own volition and not leaning                        | Intact with no visible rot                                                                                              | 2-5                                             |
| Decay Class 1                            | Sound, freshly fallen, Intact logs, bark still intact                                                 | Intact, no rot; no conks on stem; decay absent                                                                          | 5-15                                            |
| Decay Class 2                            | Sound, log holds its shape, bark mostly intact                                                        | Mostly intact; sapwood partly soft (starting to decay) but can't be pulled apart by hand                                | 15-25                                           |
| Decay Class 3                            | Log becoming soft, Heartwood sound; Bark beginning to sluff off,                                      | Sapwood can be pulled apart by hand or sapwood absent, large pieces                                                     | 25-35                                           |
| Decay Class 4                            | Heartwood rotten; Bark gone, log no longer holds shape, establishment of mosses and herbaceous plants | Soft, sapwood mostly absent, can be pulled apart easily by hand, small pieces; A metal pin can be pushed into heartwood | 35-45                                           |
| Decay Class 5                            | None, Piece no longer maintains its shape, log spreads out on ground, substrate for plants            | Soft, very small pieces, can crumble when dry                                                                           | 45-60                                           |

Supplemental Table S2. The six enzymes measured, their abbreviations, target molecules, and enzyme commission numbers (E.C. Number).

| Enzyme                       | Abbreviation | Target molecule   | E.C. Number |
|------------------------------|--------------|-------------------|-------------|
| $\beta$ -1,4-glucosidase     | BG           | Cellulose         | 3.2.1.21    |
| 1,4- $\beta$ -cellobiosidase | CHB          | Cellulose         | 3.2.1.91    |
| $\beta$ -D-xylosidase        | XYLO         | Hemicellulose     | 3.2.1.37    |
| Leucyl aminopeptidase        | LAP          | Polypeptides      | 3.4.11.1    |
| Phenol oxidase               | PHEN_OX      | Lignin            | 1.10.3.2    |
| Peroxidase                   | PER          | Hydrogen Peroxide | 1.11.1.7    |

Supplemental Table S3. Total number of observed OTUs and calculations of coverage by sample. (SD=standing dead, DC1=decay class 1, DC2=decay class 2, DC3=decay class 3, DC4=decay class 4, DC5=decay class 5). N=27 (4 per decay stage of log, 3 soil).

| Sample | Sequence coverage (%) | OTU observations | Treatment     | Accession # |
|--------|-----------------------|------------------|---------------|-------------|
| SD     | 0.997204              | 511              | Standing Dead | SRR26222475 |
| SD     | 0.996953              | 552              | Standing Dead | SRR26222474 |
| SD     | 0.997126              | 630              | Standing Dead | SRR26222463 |
| SD     | 0.997719              | 454              | Standing Dead | SRR26222465 |
| DC1    | 0.99641               | 741              | Decay Class 1 | SRR26222455 |
| DC1    | 0.997523              | 371              | Decay Class 1 | SRR26222454 |
| DC1    | 0.998032              | 457              | Decay Class 1 | SRR26222457 |
| DC1    | 0.997506              | 456              | Decay Class 1 | SRR26222453 |
| DC2    | 0.997026              | 530              | Decay Class 2 | SRR26222451 |
| DC2    | 0.997135              | 628              | Decay Class 2 | SRR26222468 |
| DC2    | 0.996894              | 604              | Decay Class 2 | SRR26222464 |
| DC2    | 0.996856              | 659              | Decay Class 2 | SRR26222452 |
| DC3    | 0.997026              | 579              | Decay Class 3 | SRR26222450 |
| DC3    | 0.996745              | 667              | Decay Class 3 | SRR26222449 |
| DC3    | 0.996981              | 632              | Decay Class 3 | SRR26222473 |
| DC3    | 0.997144              | 545              | Decay Class 3 | SRR26222462 |
| DC4    | 0.996717              | 583              | Decay Class 4 | SRR26222472 |
| DC4    | 0.997406              | 435              | Decay Class 4 | SRR26222471 |
| DC4    | 0.996681              | 700              | Decay Class 4 | SRR26222461 |
| DC4    | 0.996697              | 662              | Decay Class 4 | SRR26222458 |
| DC5    | 0.996856              | 730              | Decay Class 5 | SRR26222467 |
| DC5    | 0.996826              | 809              | Decay Class 5 | SRR26222460 |
| DC5    | 0.996636              | 654              | Decay Class 5 | SRR26222459 |
| DC5    | 0.997405              | 559              | Decay Class 5 | SRR26222456 |
| S      | 0.997544              | 520              | Soil          | SRR26222470 |
| S      | 0.997547              | 513              | Soil          | SRR26222469 |
| S      | 0.996994              | 710              | Soil          | SRR26222466 |

Supplemental Table S4. Twenty most abundant fungal OTUs identified by matching sequences to the UNITE fungal database.

| OTU      | # of sequences |                      | taxon                                 |
|----------|----------------|----------------------|---------------------------------------|
| OTU      | Size           | Guild                | Taxon                                 |
| Otu00001 | 148821         | Wood Saprotroph      | <i>Rigidoporus corticola</i>          |
| Otu00002 | 142937         | Undefined Saprotroph | <i>Saccharomycetales unclassified</i> |
| Otu00003 | 138975         | Undefined Saprotroph | <i>Scheffersomyces shehatae</i>       |
| Otu00004 | 118428         | Undefined Saprotroph | <i>Rhodotorula lignophila</i>         |
| Otu00005 | 116735         | Undefined Saprotroph | <i>Pichia</i> sp                      |
| Otu00006 | 109789         | Wood Saprotroph      | <i>Trichaptum biforme</i>             |
| Otu00007 | 84795          | Undefined Saprotroph | <i>Basidiodendron</i> sp              |
| Otu00008 | 84265          | Ectomycorrhizal      | <i>Russula</i> sp                     |
| Otu00009 | 73083          | Wood Saprotroph      | <i>Phlebia centrifuga</i>             |
| Otu00010 | 69490          | Wood Saprotroph      | <i>Trechispora</i> sp                 |
| Otu00011 | 68481          | Undefined Saprotroph | <i>Candida boleticola</i>             |
| Otu00012 | 68229          | Wood Saprotroph      | <i>Perenniporia</i>                   |
| Otu00013 | 59905          | Wood Saprotroph      | <i>Phlebia fuscoatra</i>              |
| Otu00014 | 58969          | Undefined Saprotroph | <i>Saccharomycete</i>                 |
| Otu00015 | 54601          | Endophyte            | <i>Leptodontidium</i>                 |
| Otu00016 | 53112          | Wood Saprotroph      | <i>Bjerkandera</i>                    |
| Otu00017 | 50915          | Wood Saprotroph      | <i>Aporpium macroporum</i>            |
| Otu00018 | 48536          | Undefined Saprotroph | <i>Candida ergatensis</i>             |
| Otu00019 | 47133          | Wood Saprotroph      | <i>Phanochaete sordida</i>            |
| Otu00020 | 46914          | Ectomycorrhizal      | <i>Piloderma sphaerosporum</i>        |



Supplemental Table S5. pH values determined for each composite sample derived from all standing dead trees and downed logs, and combined soil and leaf litter samples. (SD=standing dead, DC1=decay class 1, DC2=decay class 2, DC3=decay class 3, DC4=decay class 4, DC5=decay class 5, S=combined soil samples, LL=leaf litter). N=26 (4 per decay stage of log, 1 soil, 1 leaf litter).

| Sample | pH   |
|--------|------|
| SD     | 4.61 |
| SD     | 5.11 |
| SD     | 5.02 |
| SD     | 4.77 |
| DC1    | 4.79 |
| DC1    | 5.86 |
| DC1    | 6    |
| DC1    | 5.46 |
| DC2    | 4.43 |
| DC2    | 5.73 |
| DC2    | 5.50 |
| DC2    | 5.06 |
| DC3    | 4.13 |
| DC3    | 4.57 |
| DC3    | 4.75 |
| DC3    | 6.00 |
| DC4    | 4.90 |
| DC4    | 6.01 |
| DC4    | 5.14 |
| DC4    | 4.03 |
| DC5    | 5.18 |
| DC5    | 4.51 |
| DC5    | 4.69 |
| DC5    | 4.17 |
| S      | 4.84 |
| LL     | 4.79 |

Supplemental Table S6. Correlations comparing activity of individual enzymes versus %N indicates a significant increase for all enzymes except phenol oxidase.

| Enzyme                             | r     | P value |
|------------------------------------|-------|---------|
| $\beta$ -1,4-glucosidase (BG)      | 0.58  | 0.002   |
| 1,4- $\beta$ -cellobiosidase (CHB) | 0.52  | 0.01    |
| $\beta$ -D-xylosidase (XYLO)       | 0.73  | <0.0001 |
| Leucyl aminopeptidase (LAP)        | 0.69  | <0.0001 |
| Phenol oxidase (PHEN OX)           | -0.21 | 0.29    |
| Peroxidase (PER)                   | 0.52  | 0.01    |
