# Supplementary material for: Fungal Community Succession of Populus grandidentata (Bigtooth Aspen) during Wood Decomposition
Source: MDPI journal article supplement (doi:10.3390/f14102086), 2023-10-18
Supplement: s1 [file s1]

Archive with 1 entries (1 files):
- forests-2477212-supplementary.pdf
